# Supplementary material for: Relative Performance of Non-Local Cultivars and Local, Wild Populations of Switchgrass (Panicum virgatum) in Competition Experiments
Source: PubMed Central journal article supplement (PMC4847931; doi:10.1371/journal.pone.0154444), 2016-04-27
Supplement: pone.0154444.s003.pdf [file pone.0154444.s003.pdf]

**S2 Table. Mean number of seeds per plant estimated for cultivated and wild switchgrass biotypes grown under three levels of competition at two locations.**

|                      | Ohio    |          |         | Iowa    |          |         |
|----------------------|---------|----------|---------|---------|----------|---------|
|                      | Biotype | Seed No. | SE      | Biotype | Seed No. | SE      |
| No competition       | KL      | 386684.8 | 61506.7 | KL      | 709531.0 | 83015.4 |
|                      | KN1     | 351652.4 | 51710.7 | KN1     | 458896.6 | 67650.9 |
|                      | BW      | 43515.6  | 6031.9  | BW      | 69082.1  | 8576.2  |
|                      | SB      | 36682.8  | 5175.6  | SB      | 56511.7  | 8659.5  |
|                      | OH1     | 15497.0  | 1937.4  | IA1     | 64626.6  | 12120.0 |
|                      | OH2     | 40011.8  | 5515.9  | IA2     | 111137.9 | 11614.3 |
| Moderate competition | KL      | 158534.6 | 24773.3 | KL      | 385640.0 | 77402.4 |
|                      | KN1     | 141471.1 | 18827.3 | KN1     | 388620.7 | 62560.9 |
|                      | BW      | 28785.1  | 4662.3  | BW      | 28146.9  | 3758.8  |
|                      | SB      | 15782.2  | 2534.9  | SB      | 33353.7  | 5180.2  |
|                      | OH1     | 11091.2  | 2065.2  | IA1     | 27816.4  | 4922.2  |
|                      | OH2     | 13152.0  | 3546.1  | IA2     | 45159.5  | 7004.4  |
| High competition     | KL      | 62386.7  | 10721.6 | KL      | 97940.8  | 32301.1 |
|                      | KN1     | 46506.7  | 10423.6 | KN1     | 96707.9  | 34232.6 |
|                      | BW      | 7045.2   | 2322.5  | BW      | 13346.0  | 3407.5  |
|                      | SB      | 2476.3   | 754.5   | SB      | 9715.6   | 3350.2  |
|                      | OH1     | 1810.8   | 668.2   | IA1     | 7237.6   | 2201.1  |
|                      | OH2     | 2860.9   | 1327.9  | IA2     | 13172.6  | 3268.8  |
